# Supplementary material for: Fabrication of Cu2ZnSnS4 Light Absorber Using a Cost-Effective Mechanochemical Method for Photovoltaic Applications
Source: MDPI journal article supplement (doi:10.3390/ma15051708), 2022-02-24
Supplement: s1 [file s1]

Supplementary Material

# Fabrication of $\text{Cu}_2\text{ZnSnS}_4$ Light Absorber Using a Cost-Effective Mechanochemical Method for Photovoltaic Applications

Meenakshi Sahu <sup>1,2</sup>, Vasudeva Reddy Minnam Reddy <sup>3</sup>, Bomyung Kim <sup>3</sup>, Bharati Patro <sup>4</sup>, Chinho Park <sup>2,\*</sup>, Woo Kyoung Kim <sup>3,\*</sup> and Pratibha Sharma <sup>1,\*</sup>

<sup>1</sup> Department of Energy Science and Engineering, Indian Institute of Technology Bombay Powai, Mumbai 400076, India; meenakshisahu.chem@gmail.com

<sup>2</sup> Korea Institute of Energy Technology (KENTECH), 200 Hyukshin-ro, Naju, Jeollanam-do 58330, Korea

<sup>3</sup> School of Chemical Engineering, Yeungnam University, Gyeongsan 38541, Korea; drmvasudr9@gmail.com (V.R.M.R.); billionp10@ynu.ac.kr (B.K.)

<sup>4</sup> Centre for Research in Nanotechnology and Sciences Indian Institute of Technology Bombay Powai, Mumbai 400076, India; bharati@iitb.ac.in

\* Correspondence: chpark@kentech.ac.kr (C.P.); wkim@ynu.ac.kr (W.K.K.); pratibha\_sharma@iitb.ac.in (P.S.)

## Contents:

### Characterization

Figure S1: Spin-coating process for deposition of  $\text{Cu}_2\text{ZnSnS}_4$  thin films.

Figure S2: Surface and cross-section images and EDX spectra of S0 thin film.

Figure S3: Surface and cross-section images and EDX of S0\_Na thin film with sodium layer.

Figure S4: Surface and cross-section images and EDX spectra of S1 thin film.

Figure S5: Surface and cross-section images and EDS spectra of S3 thin film with sodium layer.

Figure S6: Surface and cross-section images and EDS spectra of S1\_Na thin film.

Figure S7: Surface and cross-section images and EDS spectra of S3\_Na thin film with sodium layer;

Table S1: Raman scattering band position of  $\text{Cu}_2\text{ZnSnS}_4$  and other secondary phases

Table S2: Elemental composition of  $\text{Cu}_2\text{ZnSnS}_4$  without and with sodium layer

**Citation:** Sahu, M.; Minnam Reddy, V.R.; Kim, B.; Patro, B.; Park, C.; Kim, W.K.; Sharma, P. Fabrication of  $\text{Cu}_2\text{ZnSnS}_4$  Light Absorber Using a Cost-Effective Mechanochemical Method for Photovoltaic Applications. *Materials* **2022**, *15*, 1708. <https://doi.org/10.3390/ma15051708>

Academic Editor: Nikolas J. Podraza

Received: 25 January 2022

Accepted: 22 February 2022

Published: 24 February 2022

**Publisher's Note:** MDPI stays neutral with regard to jurisdictional claims in published maps and institutional affiliations.

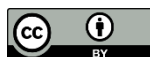

**Copyright:** © 2022 by the authors. Licensee MDPI, Basel, Switzerland. This article is an open access article distributed under the terms and conditions of the Creative Commons Attribution (CC BY) license (<https://creativecommons.org/licenses/by/4.0/>).

### Characterization

The prepared CZTS thin films were analyzed using various characterization techniques, such as X-ray diffraction (XRD), Raman spectroscopy, field-emission scanning electron microscopy (FE-SEM), energy-dispersive X-ray spectroscopy (EDS), Fourier-transform infrared (FT-IR) spectroscopy, ultraviolet-visible near-infrared (UV-Vis-NIR) spectroscopy, and Hall measurements. The crystallographic information of the as-fabricated and annealed thin films was evaluated using an X-ray diffractometer (PANalytical X'Pert-PRO MPD) with monochromatized Cu K $\alpha$  radiation ( $\lambda = 1.5406 \text{ \AA}$ ). The XRD patterns were recorded in the  $2\theta$  range of  $10^\circ$ – $80^\circ$  at a  $4^\circ/\text{min}$  scanning rate and a step size of  $0.02^\circ$ . Phase analysis of the CZTS samples was carried out using a Jobin-Yvon-Horiba (model no-HR800UV) Raman spectrometer at room temperature with a 514.5 nm laser and a working power of 10 mW. The surface morphology and cross-sectional structure of the samples were observed using FE-SEM (Hitachi, model no-S-4800). EDS was used to study the chemical composition of the samples. The optical properties of all CZTS thin films were measured in the wavelength range of 300–2500 nm using a UV-Vis-NIR spectrometer (Varian, model no-UV-5000). The electrical properties were investigated using the Hall effect measurement (model no-HMS5000) with the Van der Pauw approach with the current in the range of 1.0–0.1 nA and magnetic field intensity of 0.55 T at room temperature. Ag paste was used to make a metal contact at the corner of the thin film. FT-IR spectra were collected using a PerkinElmer FT-IR spectrometer (model no., Spectrum-100) in the KBr mode. The current density-voltage (J–V) curve of the  $0.4 \times 0.4 \text{ cm}^2$  fabricated solar cells was measured with a Keithley (model no., 2400). A Xe flash lamp (USHIO, flash type, UA-DF1, 1,000 W, 400 V) with a standard AM1.5 ( $100 \text{ mW cm}^{-2}$ ) filter was used as the light source.

Figure S1:

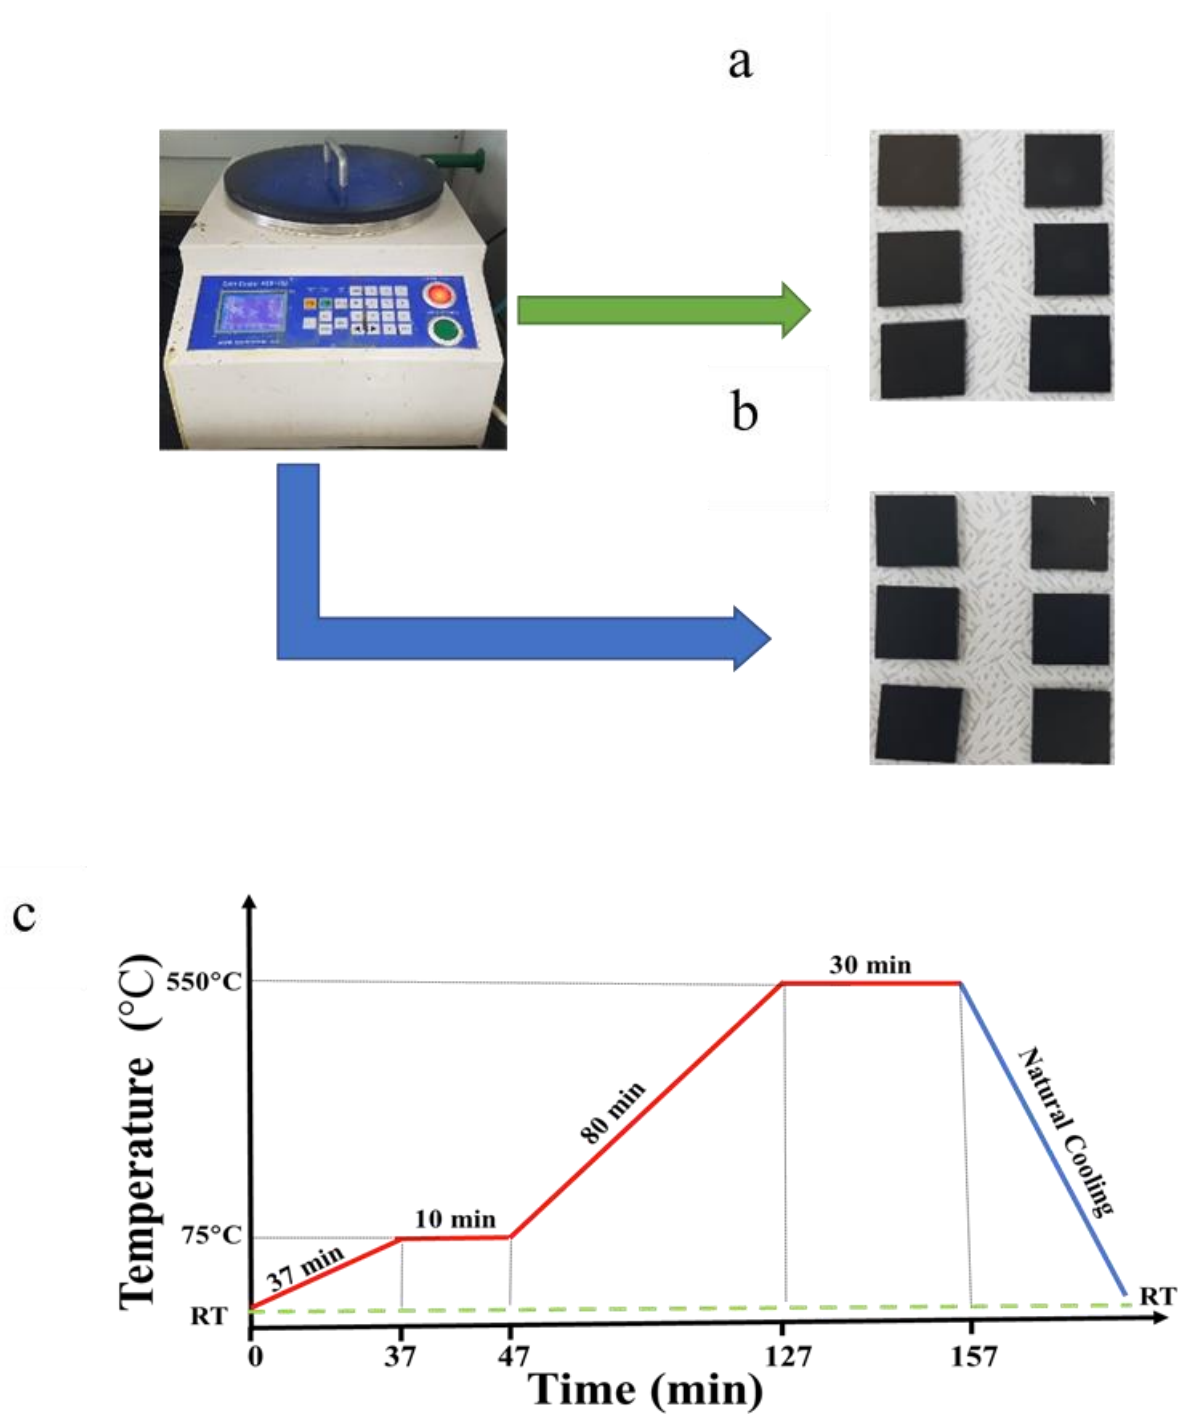

**Figure S1.** Spin Coating process for deposition of  $\text{Cu}_2\text{ZnSnS}_4$  thin films (a) without and (b) with a sodium solution, (c) Annealing profile of  $\text{Cu}_2\text{ZnSnS}_4$  thin films.

Figure S2:

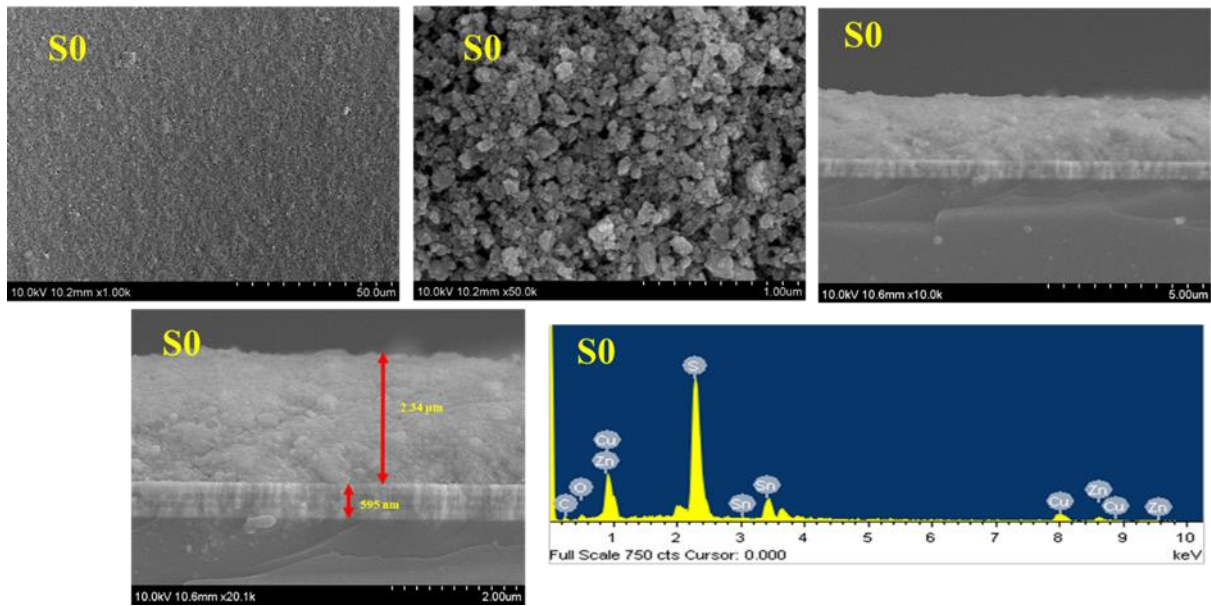

Figure S2. Surface and cross-section images and EDX spectrum of S0 thin film.

Figure S3:

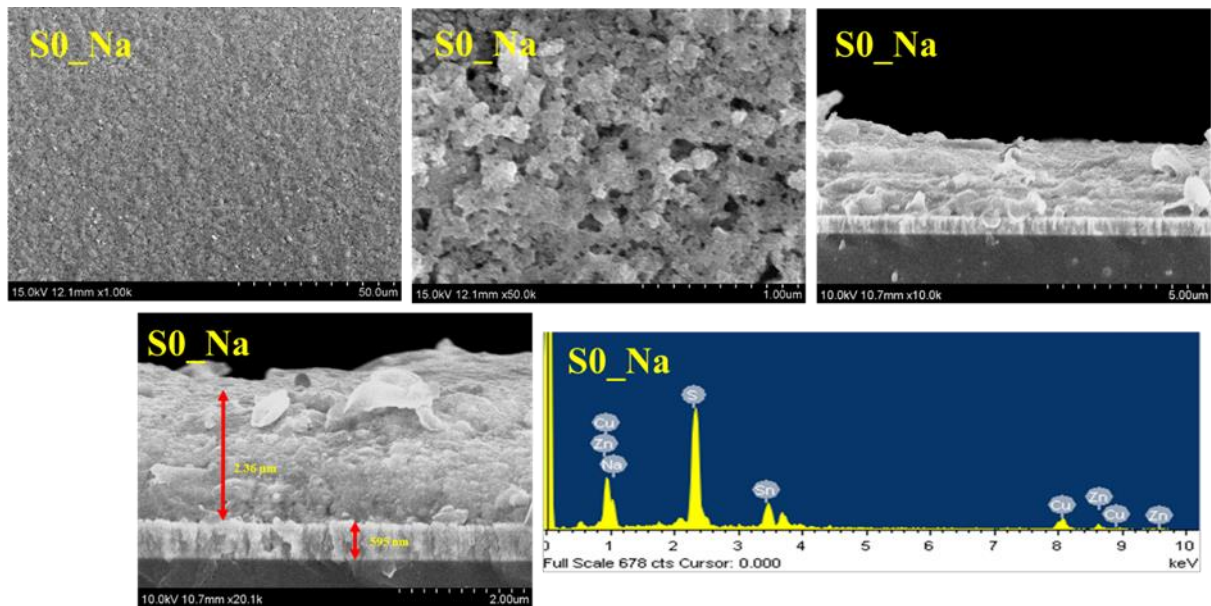

Figure S3. Surface and cross-section images and EDX spectrum of S0\_Na thin film with sodium layer.

Figure S4:

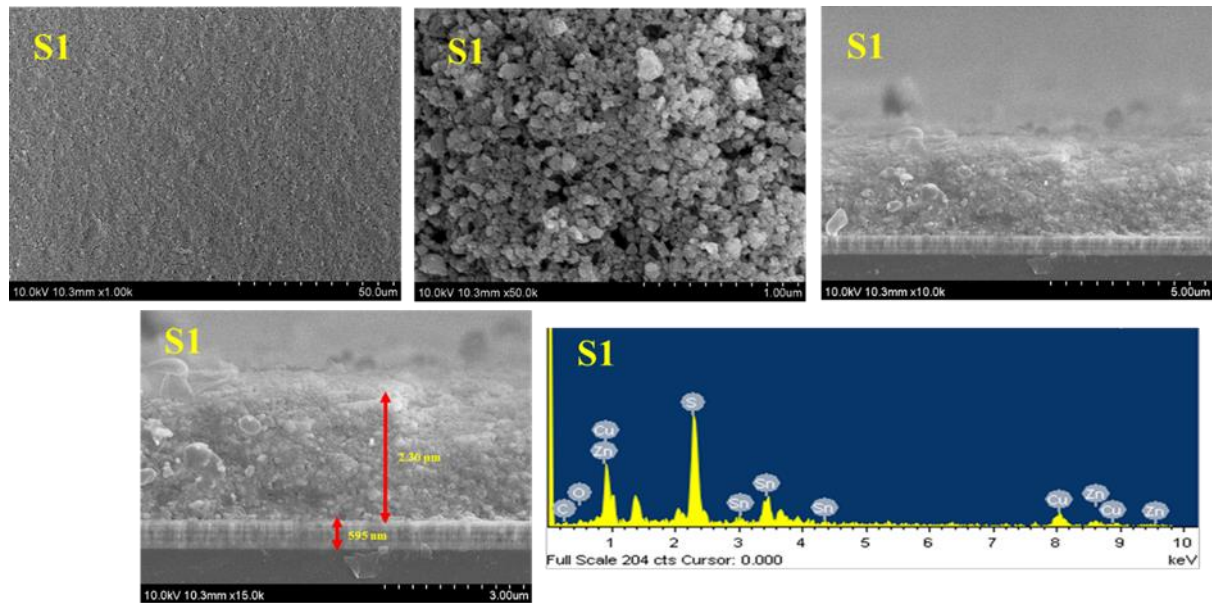

Figure S4. Surface and cross-section images and EDX spectrum of S1 thin film.

Figure S5:

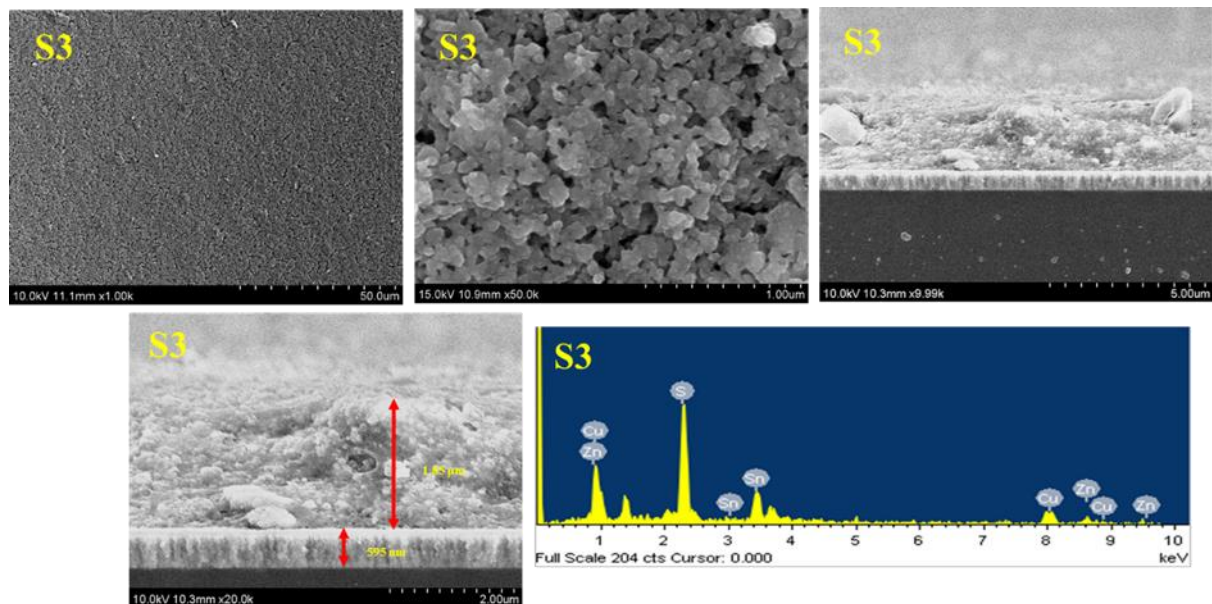

Figure S5. Surface and cross-section images and EDS spectra of S3 thin film with sodium layer



Figure S6:

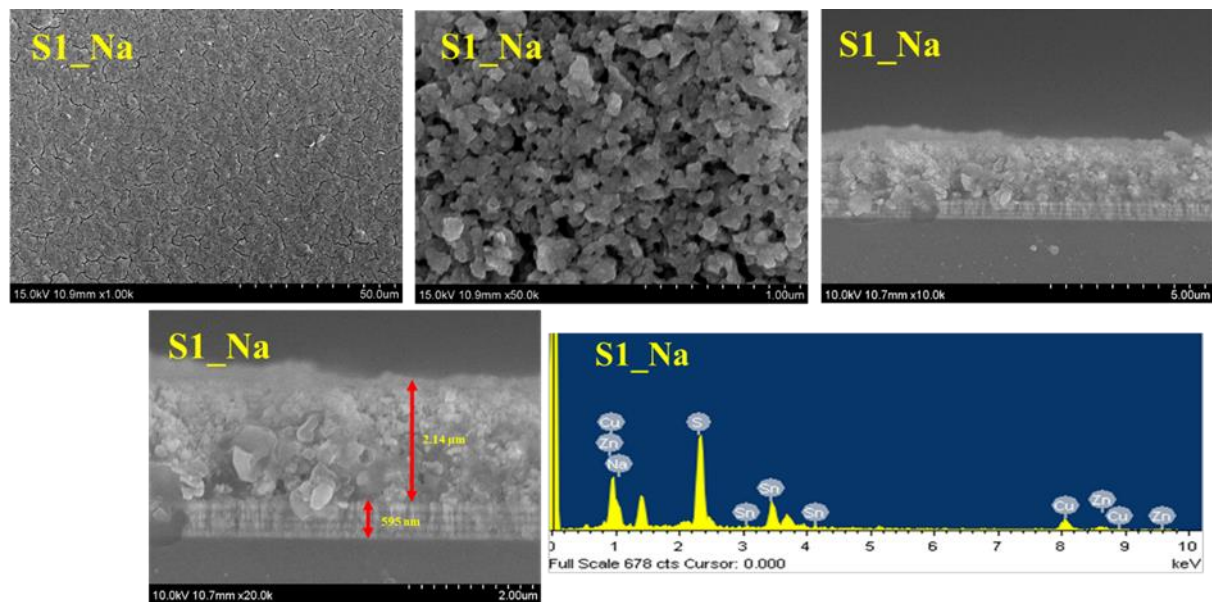

Figure S6. Surface and cross-section images and EDS spectra of S1\_Na thin film.

Figure S7:

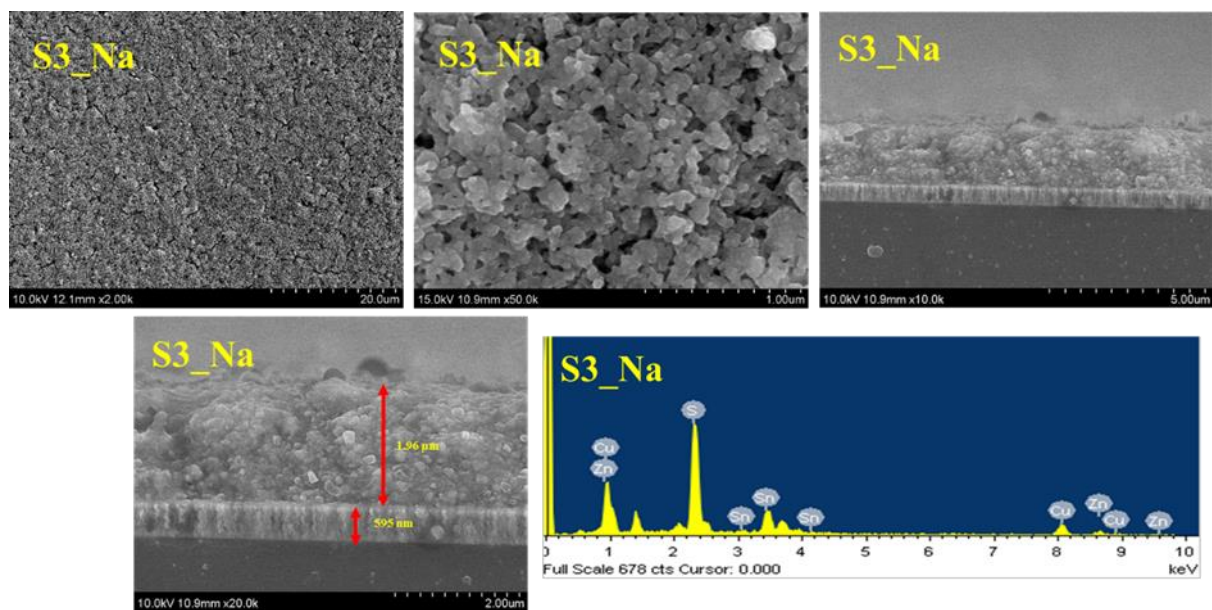

Figure S7. Surface and cross-section images and EDS spectra of S3\_Na thin film with sodium layer.

**Table S1.** Raman scattering band position of  $\text{Cu}_2\text{ZnSnS}_4$  and other secondary phases.

| Sl. No. | Phase                                | Raman peak position    | Ref.                |
|---------|--------------------------------------|------------------------|---------------------|
| 1       | $\text{Cu}_2\text{ZnSnS}_4$          | 289, 338, 358, 370     | [S1] [S2] [S3] [S4] |
| 2       | Hexa-ZnS                             | 355                    | [S5]                |
| 3       | Cubic ZnS                            | 348                    | [S2]                |
| 4       | $\text{Cu}_2\text{Sn}_3\text{S}_7$   | 268, 318, 375          | [S6]                |
| 5       | Ort. $\text{Cu}_3\text{SnS}_4$       | 318                    | [S2]                |
| 6       | Monoclinic $\text{Cu}_2\text{SnS}_3$ | 290, 352               | [S7]                |
| 7       | Tetrg. $\text{Cu}_2\text{SnS}_3$     | 297, 337, 352          | [S2],[S7]           |
| 8       | Cubic $\text{Cu}_2\text{SnS}_3$      | 267, 303, 356          | [S2],[S7]           |
| 9       | $\text{Cu}_{2-x}\text{S}$            | 475                    | [S8]                |
| 10      | $\text{Sn}_2\text{S}_3$              | 32,60,307              | [S9]                |
| 11      | $\text{SnS}_2$                       | 315                    | [S10]               |
| 12      | SnS                                  | 96, 163, 189, 220, 288 | [S10]               |

**Table S2.** Elemental composition of  $\text{Cu}_2\text{ZnSnS}_4$  without and with sodium layer.

| Sl No | Sample Name | Cu%   | Zn%   | Sn%   | S%    | Na%  | C%    | O%    |
|-------|-------------|-------|-------|-------|-------|------|-------|-------|
| 1     | S0          | 15.70 | 7.90  | 6.83  | 39.11 | -    | 19.37 | 11.37 |
| 2     | S1          | 26.97 | 16.28 | 11.52 | 45.23 | -    | -     | -     |
| 3     | S2          | 26.99 | 15.34 | 12.78 | 44.89 | -    | -     | -     |
| 4     | S3          | 26.38 | 12.87 | 12.73 | 48.02 | -    | -     | -     |
| 5     | S0_Na       | 13.83 | 5.83  | 5.61  | 38.62 | 3.70 | 17.45 | 14.96 |
| 6     | S1_Na       | 26.35 | 12.68 | 12.09 | 43.42 | 5.45 | -     | -     |
| 7     | S2_Na       | 24.26 | 11.52 | 12.04 | 45.51 | 6.68 | -     | -     |
| 8     | S3_Na       | 24.60 | 10.78 | 10.93 | 48.52 | 5.16 | -     | -     |

**Reference:**

- S1. Indubala, E., et al., *Secondary phases and temperature effect on the synthesis and sulfurization of CZTS*. Solar Energy, 2018. **173**: p. 215-224.
- S2. Fernandes, P., P. Salomé, and A. Da Cunha, *Study of polycrystalline  $\text{Cu}_2\text{ZnSnS}_4$  films by Raman scattering*. Journal of alloys and compounds, 2011. **509**(28): p. 7600-7606.
- S3. Dimitrievska, M., et al., *Multiwavelength excitation Raman scattering study of polycrystalline kesterite  $\text{Cu}_2\text{ZnSnS}_4$  thin films*. Applied Physics Letters, 2014. **104**(2): p. 021901.
- S4. Lin, X., et al., *Structural and optical properties of  $\text{Cu}_2\text{ZnSnS}_4$  thin film absorbers from ZnS and  $\text{Cu}_3\text{SnS}_4$  nanoparticle precursors*. Thin Solid Films, 2013. **535**: p. 10-13.
- S5. Shin, S.W., et al., *Studies on  $\text{Cu}_2\text{ZnSnS}_4$  (CZTS) absorber layer using different stacking orders in precursor thin films*. Solar energy materials and solar cells, 2011. **95**(12): p. 3202-3206.
- S6. Cheng, A.-J., et al., *Imaging and phase identification of  $\text{Cu}_2\text{ZnSnS}_4$  thin films using confocal Raman spectroscopy*. Journal of Vacuum Science & Technology A: Vacuum, Surfaces, and Films, 2011. **29**(5): p. 051203.
- S7. Berg, D.M., et al., *Raman analysis of monoclinic  $\text{Cu}_2\text{SnS}_3$  thin films*. Applied Physics Letters, 2012. **100**(19): p. 192103.
- S8. Emrani, A., P. Vasekar, and C.R. Westgate, *Effects of sulfurization temperature on CZTS thin film solar cell performances*. Solar Energy, 2013. **98**: p. 335-340.
- S9. Fernandes, P., P. Salomé, and A. Da Cunha, *Growth and Raman scattering characterization of  $\text{Cu}_2\text{ZnSnS}_4$  thin films*. Thin solid films, 2009. **517**(7): p. 2519-2523.
- S10. Parkin, I., et al., *The first single source deposition of tin sulfide coatings on glass: aerosol-assisted chemical vapour deposition using  $[\text{Sn}(\text{SCH}_2\text{CH}_2\text{S})_2]$* . Journal of Materials Chemistry, 2001. **11**(5): p. 1486-1490.
